# Supplementary material for: Tuning of lattice oxygen reactivity and scaling relation to construct better oxygen evolution electrocatalyst
Source: PubMed Central journal article supplement (PMC8238955; doi:10.1038/s41467-021-24182-w), 2021-06-28
Supplement: 41467_2021_24182_MOESM1_ESM.pdf [file 41467_2021_24182_MOESM1_ESM.pdf]

## SUPPLEMENTARY INFORMATION

### Supplementary Methods

**Materials.** NaNO<sub>3</sub> (99%), MnCO<sub>3</sub> (99%), Nafion solution (~5 wt.%), tetramethylammonium hydroxide (TMAOH, ~25 wt.% in H<sub>2</sub>O) and D<sub>2</sub>O (≥99.96 at.% D) were obtained from Sigma-Aldrich. Potassium iodide (≥99%), sodium thiosulfate (≥99%), potassium iodate (≥99%) and hydrochloric acid (37%) were obtained from Fisher Scientific. Absolute ethanol and isopropanol were obtained from the Chemicals Testing and Calibration Laboratory. All chemicals were used as received. High-purity water (18.25 MΩ·cm) supplied by a Milli-Q Gradient A10 system was used in all of the experiments.

**Free energy calculations.** To better reveal the factors that influence the catalytic trends of different materials, the linear scaling relations (LSRs) of adsorption energies between different intermediates centred on metal ions (\*) are introduced<sup>1</sup>. In this way, a descriptor derived from the adsorption energy such as  $\Delta G_{*O} - \Delta G_{*OH}$  or the other physical or chemical property are facile to calculate and reflect the energy landscape of a reaction system<sup>1,2</sup>. The Gibbs free energy changes for the water oxidation steps were calculated using the following Equations (S1-S4), respectively<sup>2,3</sup>,

$$\Delta G_1 = \Delta G_{*OH} - eU + \Delta G_{pH} \text{ (S1)}$$

$$\Delta G_2 = \Delta G_{*O} - \Delta G_{*OH} - eU + \Delta G_{pH} \text{ (S2)}$$

$$\Delta G_3 = \Delta G_{*OOH} - \Delta G_{*O} - eU + \Delta G_{pH} \text{ (S3)}$$

$$\Delta G_4 = 4.92 \text{ eV} - \Delta G_{*OOH} - eU + \Delta G_{pH} \text{ (S4)}$$

where U is the potential measured against normal hydrogen electrode (NHE) at standard condition (T = 298.15 K, P = 1 bar, pH = 0)<sup>4</sup>. The free energy change of the protons relative to the above-specified electrode at non-zero pH is represented by Nernst equation as  $\Delta G_{pH} = -k_B T \ln(10) \times \text{pH}$ . The Gibbs free energy differences of these intermediates include zero-point energy (ZPE) and entropy corrections (listed in [Supplementary Table 10](#)) according to  $\Delta G_i = \Delta E_i + \Delta ZPE_i - T\Delta S_i$ , where the energy differences  $\Delta E_i$  are calculated with respect to H<sub>2</sub>O and H<sub>2</sub> (at U = 0 and pH = 0). The theoretical overpotential is defined as the lowest potential at which all reaction steps are thermodynamically downhill<sup>2,5</sup>.

## Supplementary Tables

**Supplementary Table 1** | Computed magnetization moment and charge of oxygen ions in  $\text{Na}_x\text{Mn}_3\text{O}_7$ . Magnetization moment results from the presence of unpaired electrons in materials, and the fully paired electrons lead to a net magnetic moment of zero. For  $\text{Na}_2\text{Mn}_3\text{O}_7$ , the oxygen ions tend to form 8-electron stable structures with no unpaired electrons. When the number of  $\text{Na}^+$  decreases from  $x=2$ , lattice oxygen ions are activated and oxidized, meanwhile Mn would be in their maximum achievable oxidation states of  $4^+$ . Thus, the unpaired electrons are generated in such oxidized oxygen ions.

| Model                                            | Magnetization moment ( $\mu\text{B}$ ) | Charge (e) |
|--------------------------------------------------|----------------------------------------|------------|
| $\text{Na}_2\text{Mn}_3\text{O}_7\text{-S1}$     | 0.11                                   | -1.03      |
| $\text{Na}_{1.5}\text{Mn}_3\text{O}_7\text{-S2}$ | 0.17                                   | -1.00      |
| $\text{Na}_{1.5}\text{Mn}_3\text{O}_7\text{-S3}$ | 0.23                                   | -0.94      |
| $\text{NaMn}_3\text{O}_7\text{-S4}$              | 0.30                                   | -0.89      |
| $\text{Na}_{0.5}\text{Mn}_3\text{O}_7\text{-S5}$ | 0.34                                   | -0.80      |
| $\text{Na}_{0.5}\text{Mn}_3\text{O}_7\text{-S6}$ | 0.60                                   | -0.66      |

**Supplementary Table 2** | Data for free energy change in various models for  $\text{Na}_x\text{Mn}_3\text{O}_7$ .

| Model                                            | $\Delta G_1$ (eV) | $\Delta G_2$ (eV) | $\Delta G_3$ (eV) | $\Delta G_4$ (eV) | P1 (eV) | P2 (eV) | $\eta$ (eV) |
|--------------------------------------------------|-------------------|-------------------|-------------------|-------------------|---------|---------|-------------|
| $\text{Na}_2\text{Mn}_3\text{O}_7\text{-S1}$     | 0.61              | 0.67              | 2.17              | 1.47              | 0       | -0.40   | 0.94        |
| $\text{Na}_{1.5}\text{Mn}_3\text{O}_7\text{-S2}$ | 0.51              | 1.24              | 1.60              | 1.57              | 0.57    | -0.40   | 0.37        |
| $\text{Na}_{1.5}\text{Mn}_3\text{O}_7\text{-S3}$ | 0.34              | 1.44              | 1.68              | 1.47              | 0.77    | -0.14   | 0.45        |
| $\text{NaMn}_3\text{O}_7\text{-S4}$              | 0.46              | 1.56              | 1.54              | 1.36              | 0.89    | -0.14   | 0.33        |
| $\text{Na}_{0.5}\text{Mn}_3\text{O}_7\text{-S5}$ | 0.71              | 1.64              | 1.48              | 1.08              | 0.97    | -0.14   | 0.41        |
| $\text{Na}_{0.5}\text{Mn}_3\text{O}_7\text{-S6}$ | 0.87              | 1.81              | 1.43              | 0.82              | 1.14    | 0       | 0.58        |
| Ideal                                            | 1.23              | 1.23              | 1.23              | 1.23              | 0.56    | -0.78   | 0           |

**Supplementary Table 3** | Data for free energy change in various assumed models based on the scenario without considering the  $\text{Na}^+$ -mediated geometric effect (that is, P2 is fixed to 0, whereas P1 is varied due to the  $\text{Na}^+$ -mediated electronic effect.).

| Assumed model | $\Delta G_1$ (eV) | $\Delta G_2$ (eV) | $\Delta G_3$ (eV) | $\Delta G_4$ (eV) | P1 (eV) | P2 (eV) | $\eta$ (eV) | $\eta_{\min}$ (eV) |
|---------------|-------------------|-------------------|-------------------|-------------------|---------|---------|-------------|--------------------|
|               |                   |                   |                   |                   |         |         |             |                    |

|    |      |      |      |      |      |   |      |      |
|----|------|------|------|------|------|---|------|------|
| S1 | 0.61 | 0.67 | 2.57 | 1.07 | 0    | 0 | 1.34 | 0.39 |
| S2 | 0.51 | 1.24 | 2.00 | 1.17 | 0.57 | 0 | 0.77 | 0.39 |
| S3 | 0.34 | 1.44 | 1.80 | 1.35 | 0.77 | 0 | 0.57 | 0.39 |
| S4 | 0.46 | 1.56 | 1.68 | 1.22 | 0.89 | 0 | 0.45 | 0.39 |
| S5 | 0.71 | 1.64 | 1.60 | 0.96 | 0.97 | 0 | 0.41 | 0.39 |
| S6 | 0.87 | 1.81 | 1.43 | 0.82 | 1.14 | 0 | 0.58 | 0.39 |

**Supplementary Table 4** | Data for free energy change in various assumed models based on the scenario without considering the Na<sup>+</sup>-mediated electronic effect (that is, P1 is fixed to 0, whereas P2 is varied due to the Na<sup>+</sup>-mediated geometric effect.).

| Assumed model | $\Delta G_1$ (eV) | $\Delta G_2$ (eV) | $\Delta G_3$ (eV) | $\Delta G_4$ (eV) | P1 (eV) | P2 (eV) | $\eta$ (eV) | $\eta_{\min}$ (eV) |
|---------------|-------------------|-------------------|-------------------|-------------------|---------|---------|-------------|--------------------|
| S1            | 0.61              | 0.67              | 2.17              | 1.47              | 0       | -0.40   | 0.94        | 0.19               |
| S2            | -0.06             | 0.67              | 2.17              | 2.14              | 0       | -0.40   | 0.94        | 0.19               |
| S3            | -0.43             | 0.67              | 2.45              | 2.24              | 0       | -0.14   | 1.22        | 0.33               |
| S4            | -0.43             | 0.67              | 2.43              | 2.25              | 0       | -0.14   | 1.20        | 0.33               |
| S5            | -0.26             | 0.67              | 2.45              | 2.05              | 0       | -0.14   | 1.22        | 0.33               |
| S6            | -0.27             | 0.67              | 2.57              | 1.96              | 0       | 0       | 1.34        | 0.39               |

**Supplementary Table 5** | Data for free energy of  $\Delta G^{*OH}$ ,  $\Delta G^{*O}$ ,  $\Delta G^{*OOH}$  in various models for Na<sub>x</sub>Mn<sub>3</sub>O<sub>7</sub>.

| Model | $\Delta G^{*OH}$ (eV) | $\Delta G^{*O}$ (eV) | $\Delta G^{*OOH}$ (eV) |
|-------|-----------------------|----------------------|------------------------|
| S1    | 0.61                  | 1.28                 | 3.45                   |
| S2    | 0.51                  | 1.75                 | 3.35                   |
| S3    | 0.34                  | 1.78                 | 3.46                   |
| S4    | 0.46                  | 2.02                 | 3.56                   |
| S5    | 0.71                  | 2.35                 | 3.83                   |
| S6    | 0.87                  | 2.68                 | 4.11                   |

**Supplementary Table 6** | Na/Mn mole ratio ( $y$ , measured from <sup>a</sup>ICP-OES and <sup>b</sup>ICP-MS) and BET surface area (SA) of Na<sub>*x*</sub>Mn<sub>3</sub>O<sub>7- $\delta$</sub> .

| $x$ in Na <sub><i>x</i></sub> Mn <sub>3</sub> O <sub>7-<math>\delta</math></sub> | <sup>a</sup> $y$ | <sup>b</sup> $y$ | SA (m <sup>2</sup> g <sup>-1</sup> ) |
|----------------------------------------------------------------------------------|------------------|------------------|--------------------------------------|
| 2.0                                                                              | 0.66             | 0.66             | 1.10                                 |
| 1.5                                                                              | 0.50             | 0.51             | 1.42                                 |
| 1.0                                                                              | 0.34             | 0.33             | 1.55                                 |
| 0.70                                                                             | 0.23             | 0.24             | 1.98                                 |

**Supplementary Table 7** | Fitting results of Mn K-edge EXAFS curves. (<sup>a</sup> $R$ : bond distance; <sup>b</sup> $CN$ : coordination numbers; <sup>c</sup> $\sigma^2$ : Debye-Waller factors; <sup>d</sup> $S_0^2$ : Amplitude attenuation factors.)

| Sample                                           | bond | <sup>a</sup> $R$ (Å) | <sup>b</sup> $CN$ | <sup>c</sup> $\sigma^2$ (Å <sup>2</sup> ) | <sup>d</sup> $R$ factor |
|--------------------------------------------------|------|----------------------|-------------------|-------------------------------------------|-------------------------|
| Na <sub>2</sub> Mn <sub>3</sub> O <sub>7</sub>   | Mn-O | 1.907                | 6.0 (fixed)       | 0.005                                     | 0.016                   |
| Na <sub>1.5</sub> Mn <sub>3</sub> O <sub>7</sub> | Mn-O | 1.910                | 5.78              | 0.005                                     | 0.012                   |
| NaMn <sub>3</sub> O <sub>7</sub>                 | Mn-O | 1.914                | 5.31              | 0.005                                     | 0.023                   |
| Na <sub>0.7</sub> Mn <sub>3</sub> O <sub>7</sub> | Mn-O | 1.918                | 4.86              | 0.005                                     | 0.032                   |

**Supplementary Table 8** | Summary of the results from ICP-MS measurements of the electrolyte collected from stability tests on  $\text{Na}_x\text{Mn}_3\text{O}_7$ . The reported percentages refer to the mass of the dissolved element with respect to the initial element mass in the electrode.

|                                        | Na    | Mn    |
|----------------------------------------|-------|-------|
| $\text{Na}_2\text{Mn}_3\text{O}_7$     | 5.10% | 0.11% |
| $\text{Na}_{1.5}\text{Mn}_3\text{O}_7$ | 0.23% | 0.10% |
| $\text{NaMn}_3\text{O}_7$              | 0.17% | 0.13% |
| $\text{Na}_{0.7}\text{Mn}_3\text{O}_7$ | 0.10% | 0.11% |

**Supplementary Table 9** | Comparison of free energy change for deprotonation of \*O and formation of \*OOH on  $1\times 1$ ,  $1\times 2$  and  $2\times 2$   $\text{NaMn}_3\text{O}_7$  supercell. The overpotential of potential-determining step is also shown.

| Model       | $\Delta G_2$ (eV) | $\Delta G_3$ (eV) | $\eta$ (eV) |
|-------------|-------------------|-------------------|-------------|
| $1\times 1$ | 1.556             | 1.544             | 0.326       |
| $1\times 2$ | 1.555             | 1.543             | 0.325       |
| $2\times 2$ | 1.24              | 1.60              | 0.37        |

**Supplementary Table 10** | The calculated zero-point energy and entropy correction values (in eV).

|                      | E      | ZPE  | TS   | G      |
|----------------------|--------|------|------|--------|
| $\text{H}_2$         | -6.99  | 0.28 | 0.40 | -7.12  |
| $\text{H}_2\text{O}$ | -14.15 | 0.57 | 0.67 | -14.25 |

## Supplementary Figures

| $\text{Na}_{2x/7}[\text{Mn}_{6/7}\square_{1/7}]_2\text{O}_2$ | $x = 0$ | $x = 1/7$ | $x = 2/7$ | $x = 3/7$ |
|--------------------------------------------------------------|---------|-----------|-----------|-----------|
| $h^{\text{O}}$ (mathematical)                                | 0       | 1/28      | 1/14      | 3/28      |
| $h^{\text{O}}$ (spin density)                                | 0.06    | 0.09-0.12 | 0.15      | 0.17-0.30 |
| $h^{\text{O}}$ (bader charge)                                | 0.49    | 0.50-0.53 | 0.56      | 0.60-0.67 |

**Supplementary Fig. 1** | The calculated number of oxygen hole per oxygen ( $h^{\text{O}}$ ) based on crystal field theory, magnetization moment and bader charge analysis. In general formulation  $\text{A}[\text{M}'_x\text{M}_{1-x}]\text{O}_2$ , the average number of  $|\text{O}_{2p}$  per oxygen,  $n$ , is directly linked to the  $x$  stoichiometry (that is, for  $x=0, 1/3$  and  $2/3$ , the average number of M around each O is three, two and one, respectively, thus leaving  $n = 0, 1$  and  $2$   $|\text{O}_{2p}$  per oxygen in each structure.). Note the calculated  $h^{\text{O}}$  is different from but the trend is in accordance with the mathematical prediction from crystal field theory, because all transition metals make iono-covalent interactions with oxygen in DFT calculations.

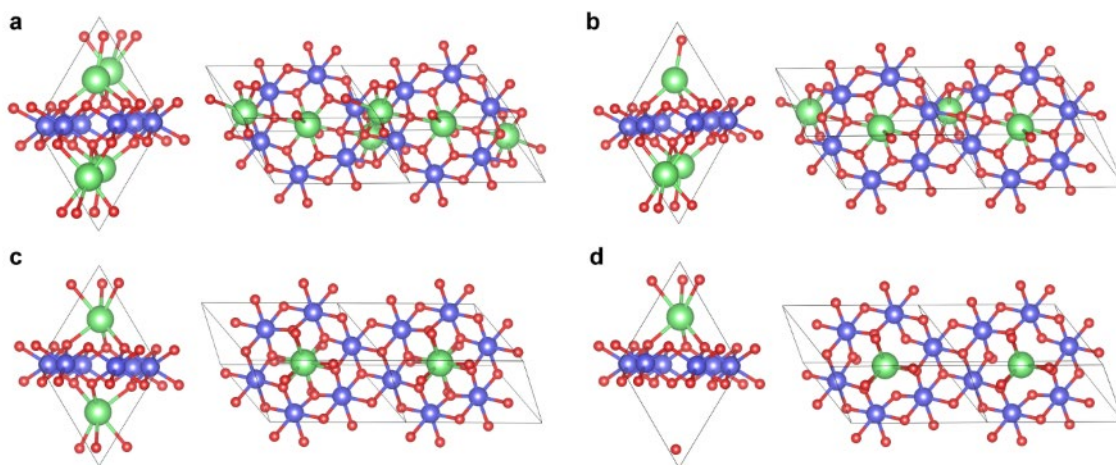

**Supplementary Fig. 2** | Bulk models of  $\text{Na}_x\text{Mn}_3\text{O}_7$  with side view (left) and top view (right). (**a**,  $x = 2$ , **b**,  $x = 1.5$ , **c**,  $x = 1$ , **d**,  $x = 0.5$ ; Blue, red and green spheres represent Mn, O and Na atoms, respectively.)

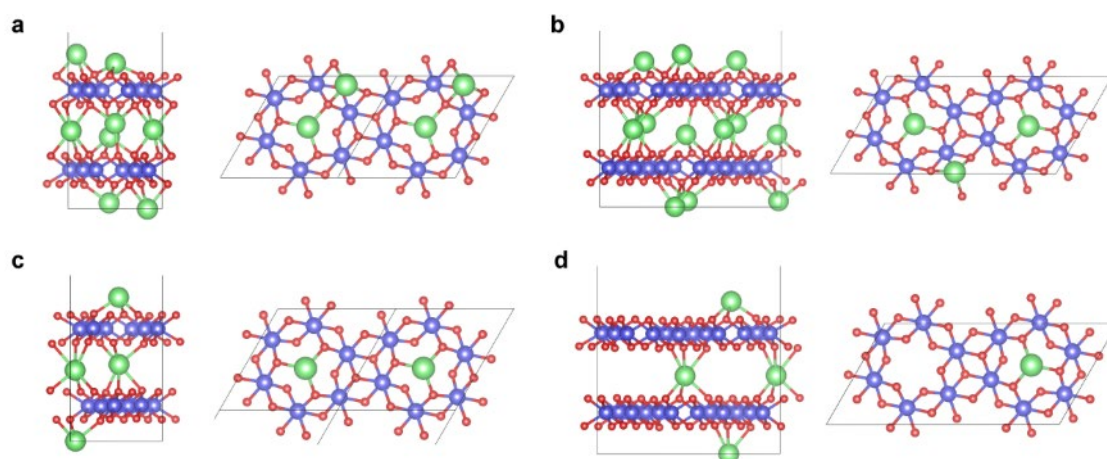

**Supplementary Fig. 3** | Slab models of  $\text{Na}_x\text{Mn}_3\text{O}_7$  with side view (left) and top view (right). (**a**,  $x = 2$ , **b**,  $x = 1.5$ , **c**,  $x = 1$ , **d**,  $x = 0.5$ ; Blue, red and green spheres represent Mn, O and Na atoms, respectively.)



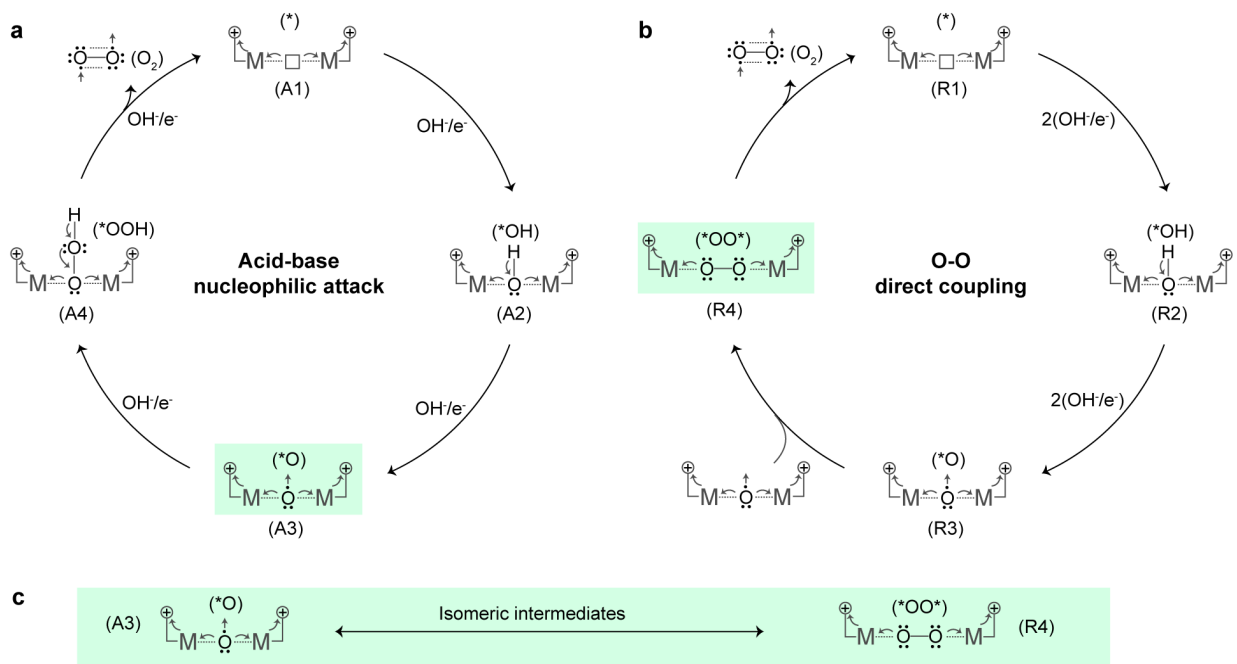

**Supplementary Fig. 4** | Scheme of OER pathways including acid-base nucleophilic attack and O-O direct coupling, where A3 ( $^*O$ ) and R4 ( $^*OO^*$ ) are the corresponding isomeric intermediates.

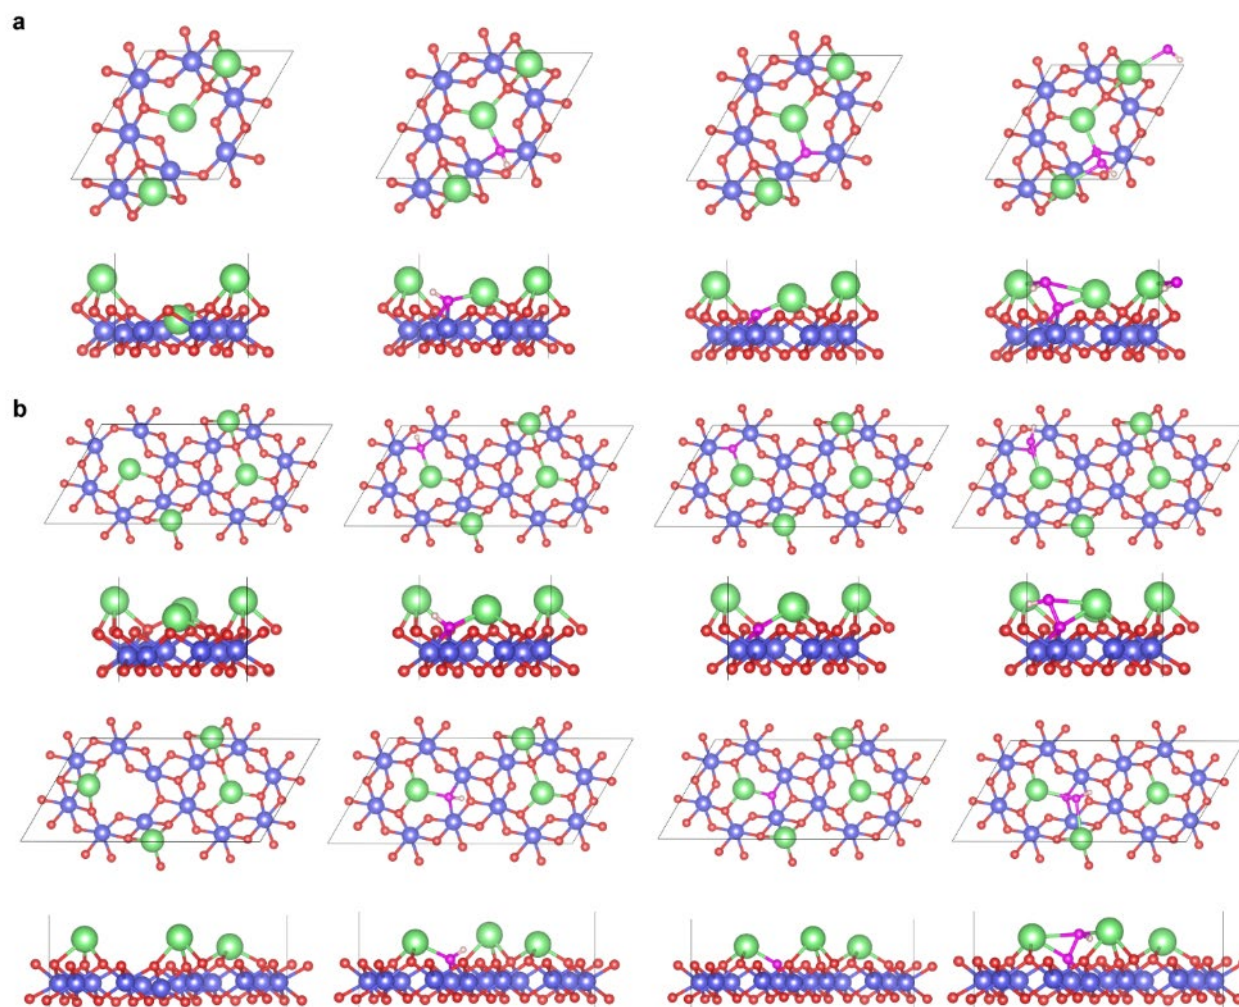

**Supplementary Fig. 5** | Adsorption models of  $\text{Na}_2\text{Mn}_3\text{O}_7$  (a) and  $\text{Na}_{1.5}\text{Mn}_3\text{O}_7$  (b) for water oxidation. Blue, red and green spheres represent Mn, O and Na atoms, respectively. Pink spheres represent the oxygen atoms which are related to the intermediates of  $\text{*OH}$ ,  $\text{*O}$  and  $\text{*OOH}$ .

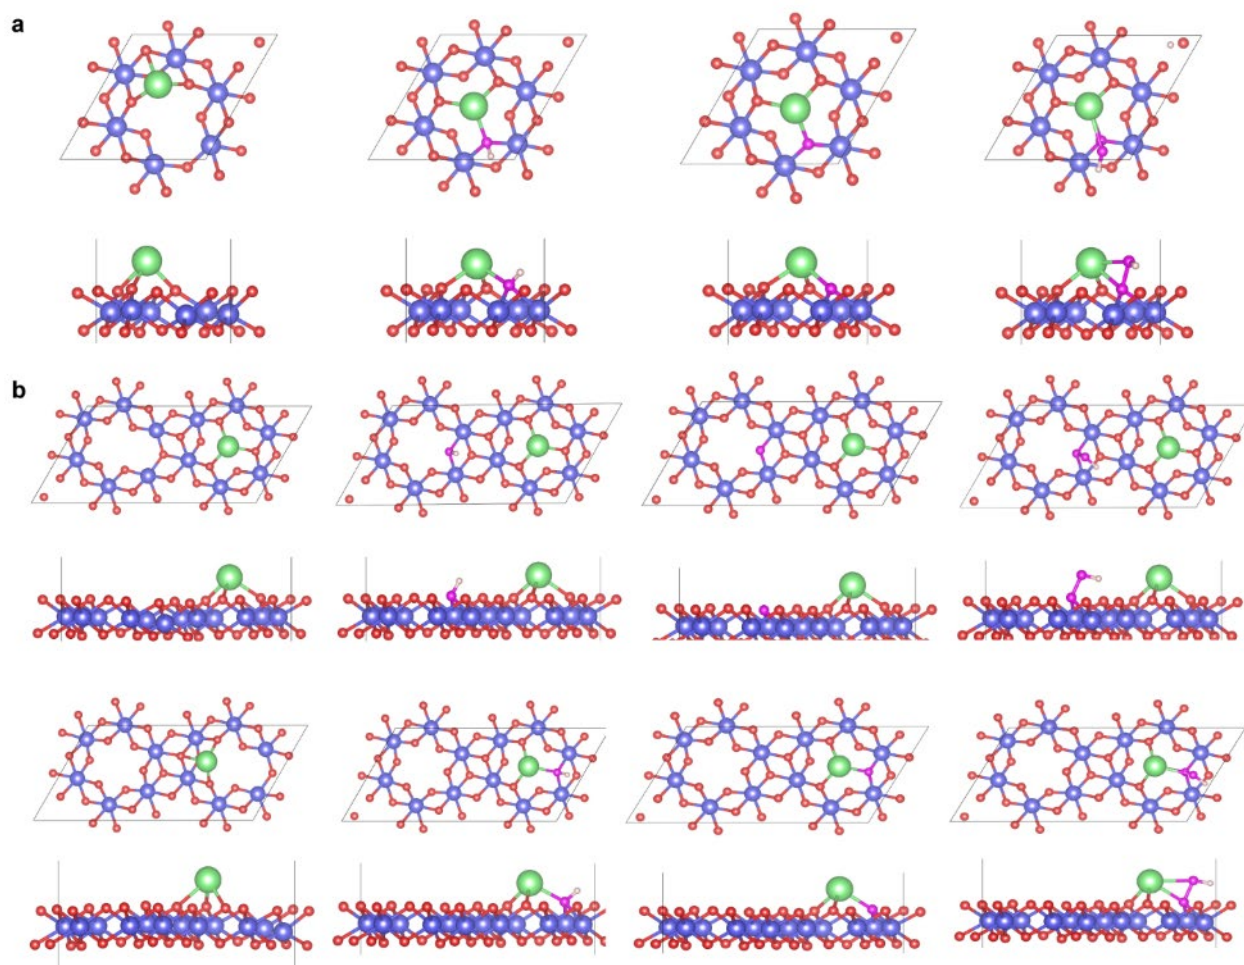

**Supplementary Fig. 6** | Adsorption models of  $\text{NaMn}_3\text{O}_7$  (**a**) and  $\text{Na}_{0.5}\text{Mn}_3\text{O}_7$  (**b**) for water oxidation. Blue, red and green spheres represent Mn, O and Na atoms, respectively. Pink spheres represent the oxygen atoms which are related to the intermediates of  $\text{*OH}$ ,  $\text{*O}$  and  $\text{*OOH}$ .

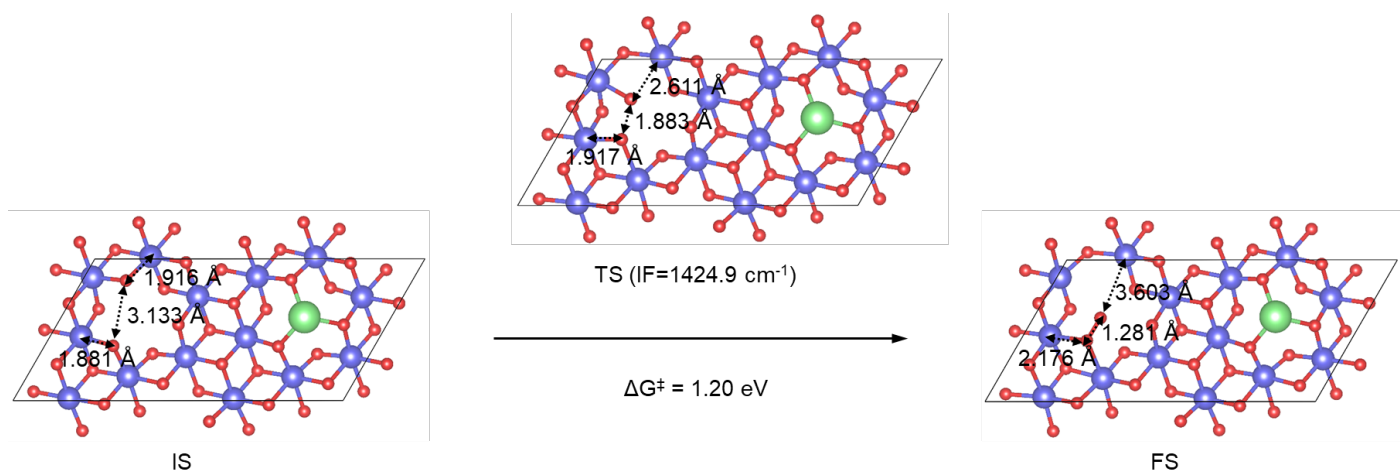

**Supplementary Fig. 7** | Activation free energy ( $\Delta G^\ddagger$ ) for O-O bond formation and corresponding adsorption and transition state structures on  $\text{S}_6$  in  $\text{Na}_{0.5}\text{Mn}_3\text{O}_7$  slab. (IS: initial state; TS: transition state; FS: final state; IF: imaginary frequency).

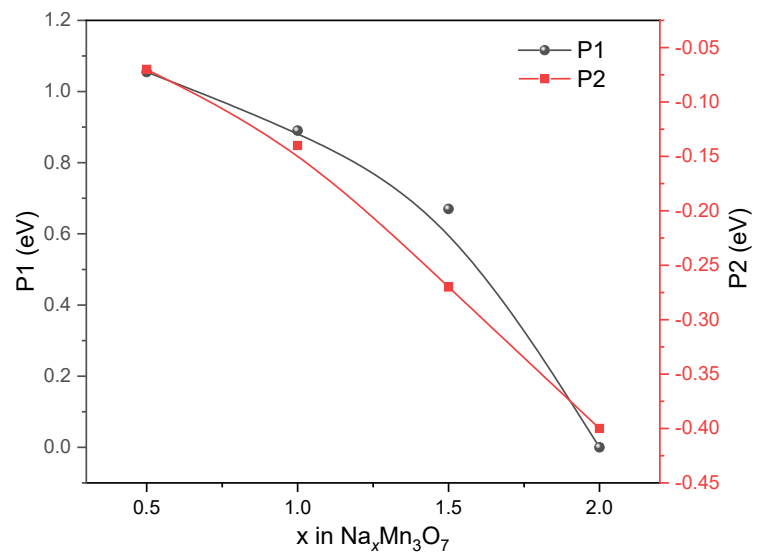

**Supplementary Fig. 8** | Correlation between the parameters of P1 and P2 and the number of  $\text{Na}^+$  in  $\text{Na}_x\text{Mn}_3\text{O}_7$ .

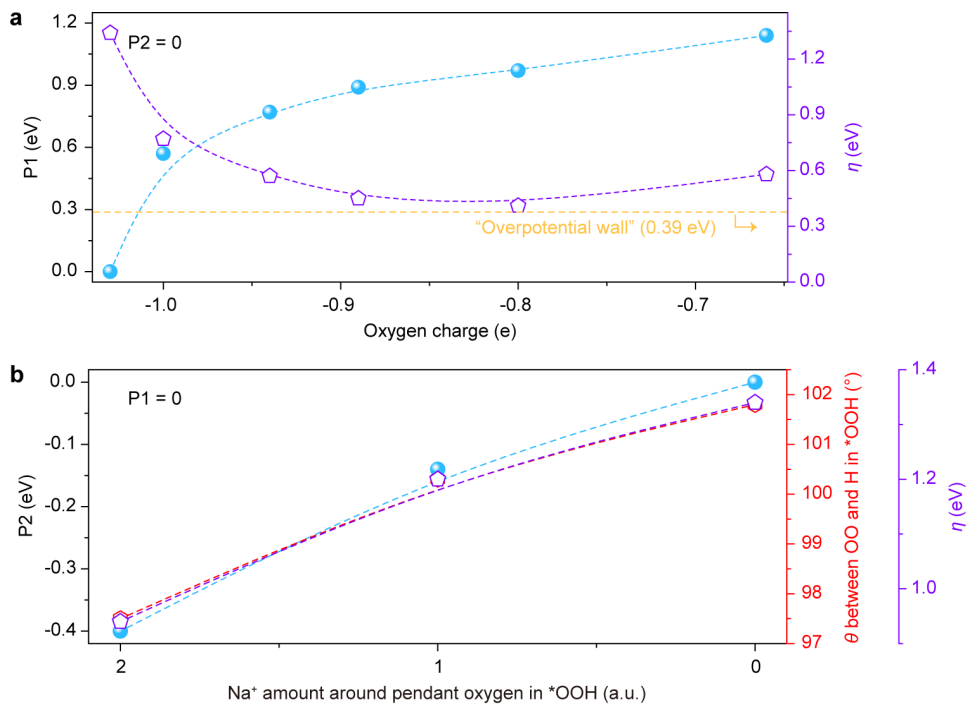

**Supplementary Fig. 9** | **a**, Shifts in P1 to regulate the theoretical overpotential ( $\eta$ ) by tuning oxygen charge. **b**, Shifts in P2 and  $\theta$  to regulate the theoretical overpotential ( $\eta$ ) by tuning Na<sup>+</sup>-specific non-covalent interaction to circumvent LSR between \*OOH and \*OH.

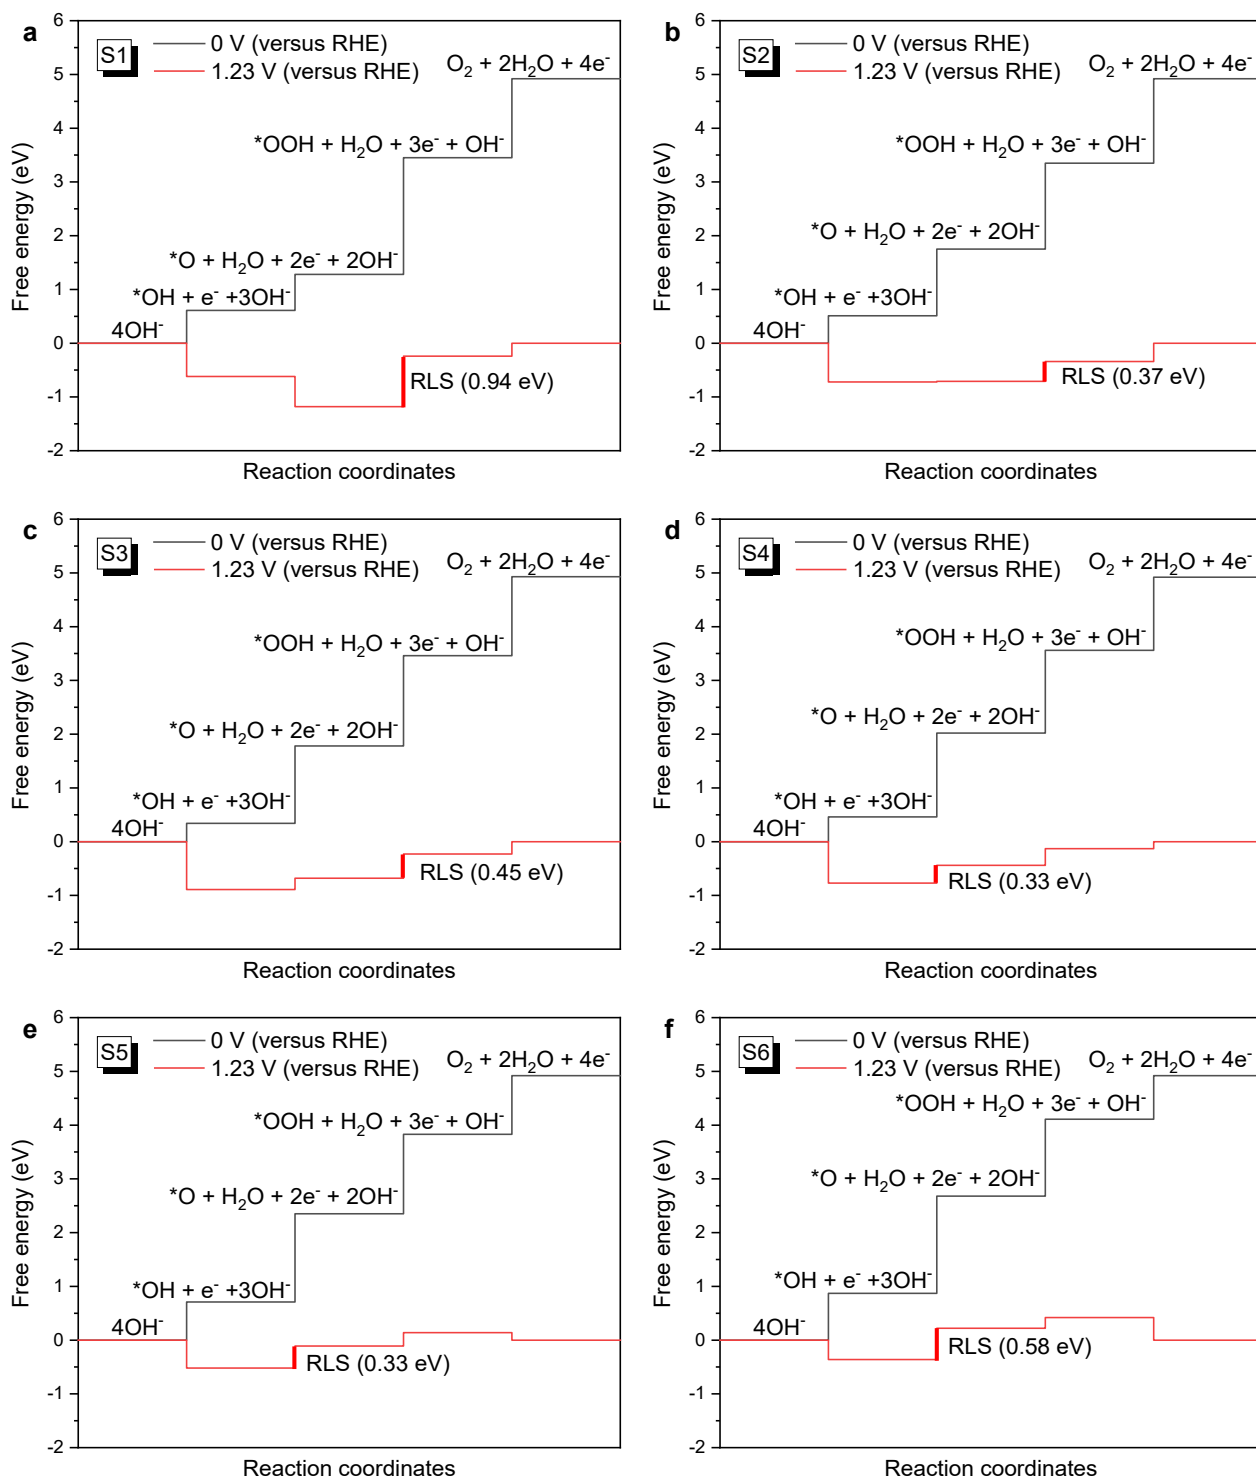

**Supplementary Fig. 10** | Free energies of OER steps on different oxygen coordination environments in  $\text{Na}_x\text{Mn}_3\text{O}_7$  slabs under different potentials. (RLS represents rate-limiting step.)

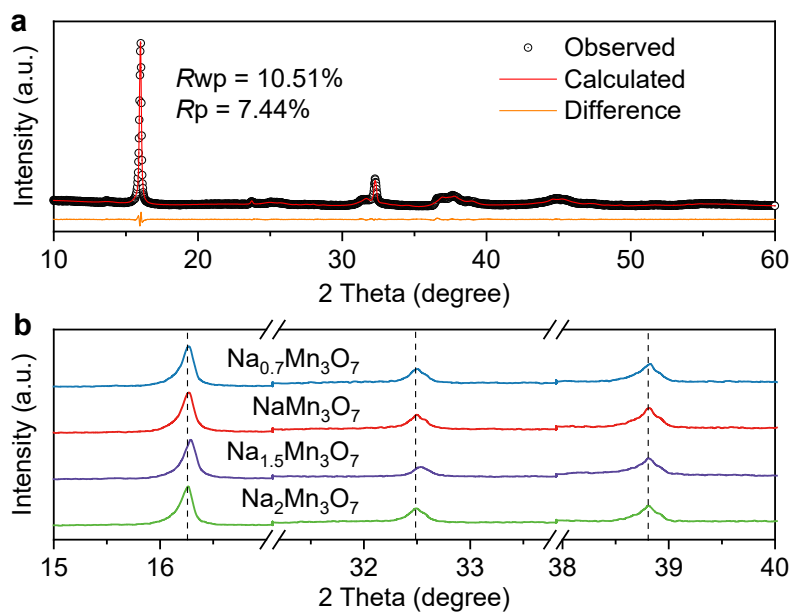

**Supplementary Fig. 11** | **a**, Rietveld refinement of XRD pattern for  $\text{Na}_2\text{Mn}_3\text{O}_7$ . **b**, XRD patterns of as-synthesized  $\text{Na}_x\text{Mn}_3\text{O}_7$  materials.



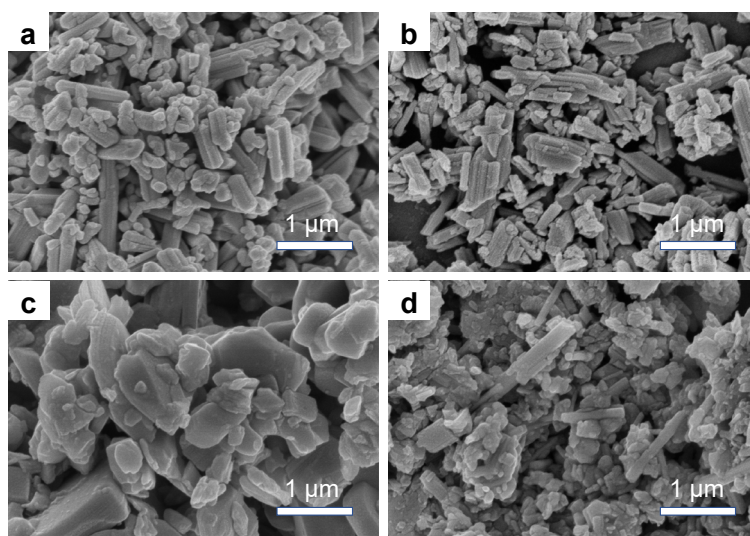

**Supplementary Fig. 12** | SEM images of as-synthesized  $\text{Na}_x\text{Mn}_3\text{O}_7$  materials (**a**,  $\text{Na}_2\text{Mn}_3\text{O}_7$ , **b**,  $\text{Na}_{1.5}\text{Mn}_3\text{O}_7$ , **c**,  $\text{NaMn}_3\text{O}_7$ , **d**,  $\text{Na}_{0.7}\text{Mn}_3\text{O}_7$ ).

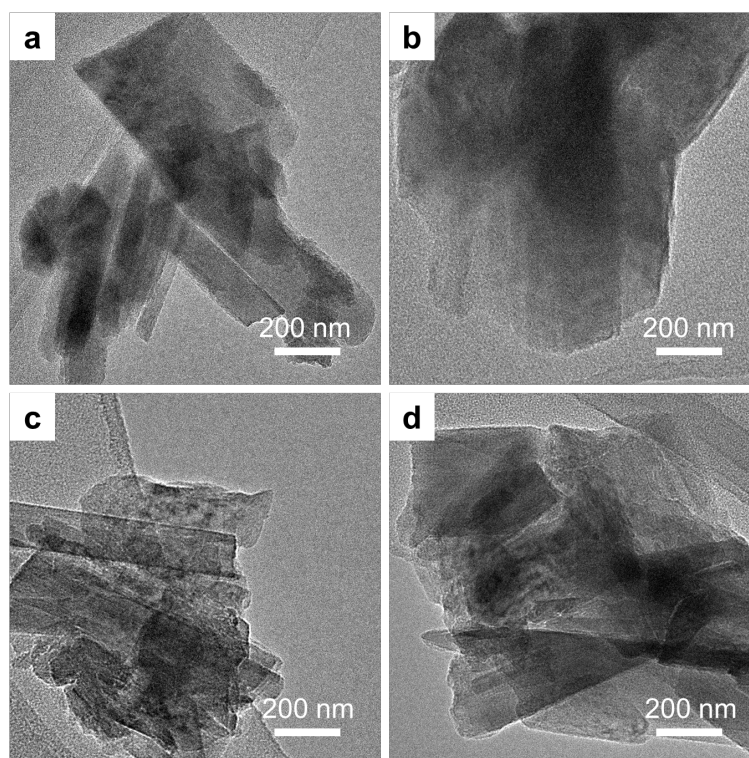

**Supplementary Fig. 13** | HRTEM images of as-synthesized  $\text{Na}_x\text{Mn}_3\text{O}_7$  materials (**a**,  $\text{Na}_2\text{Mn}_3\text{O}_7$ , **b**,  $\text{Na}_{1.5}\text{Mn}_3\text{O}_7$ , **c**,  $\text{NaMn}_3\text{O}_7$ , **d**,  $\text{Na}_{0.7}\text{Mn}_3\text{O}_7$ ).

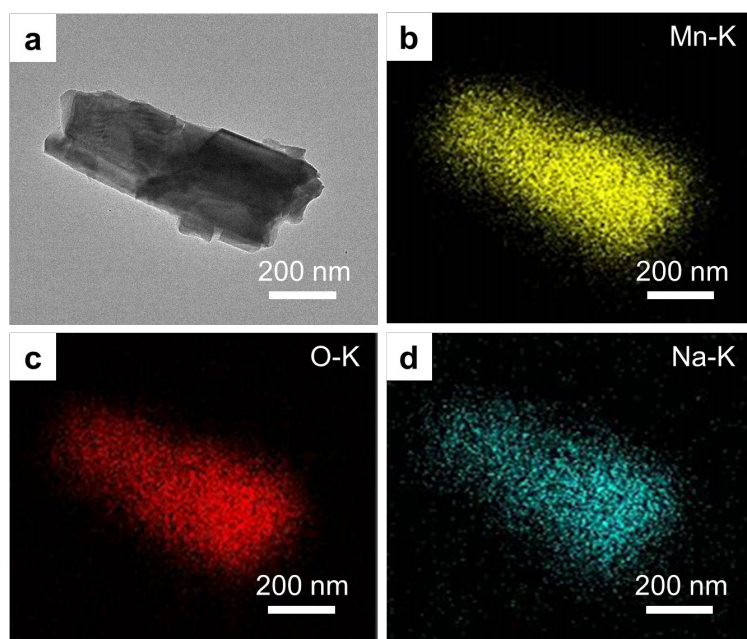

**Supplementary Fig. 14** | TEM image and energy dispersive spectrometer (EDS) mapping images of NaMn<sub>3</sub>O<sub>7</sub>.

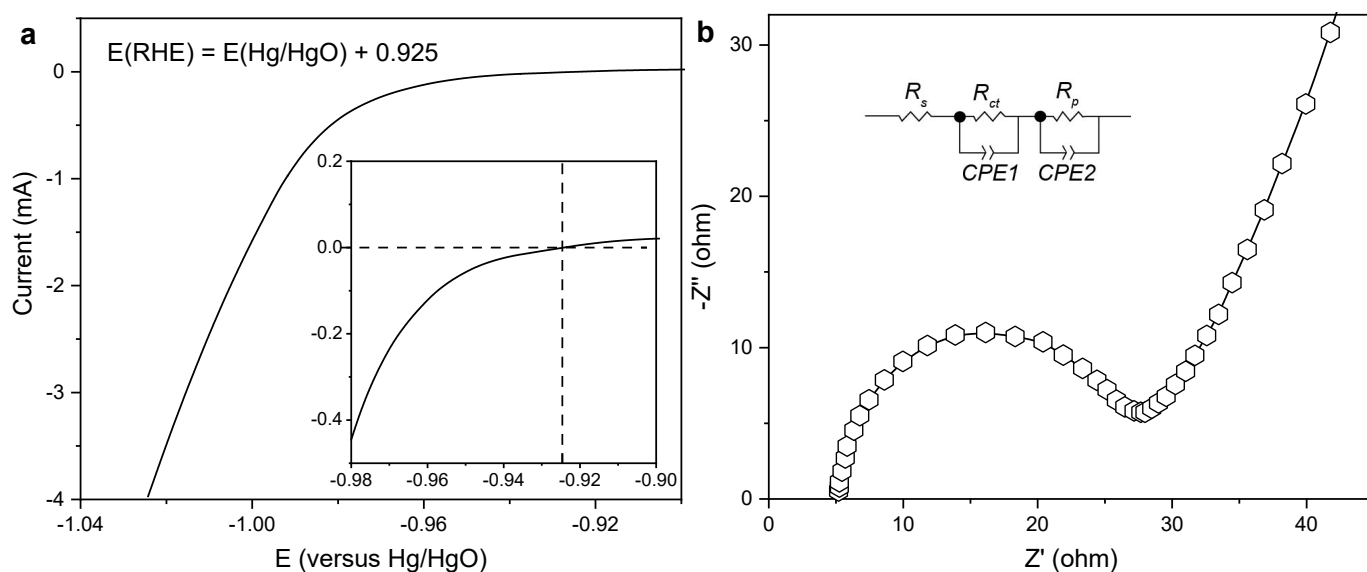

**Supplementary Fig. 15** | **a**, Reversible hydrogen electrode (RHE) calibration. **b**, solution resistance measurement. Calibration of the Hg/HgO reference electrode was conducted in a standard three-electrode system at ambient temperature and in saturated  $\text{H}_2$  atmosphere using 40 wt% Pt/C ( $0.250 \text{ mg cm}^{-2}$ ) and Pt foil as the working and counter electrode at a rotational speed of 1600 rpm<sup>6</sup>.

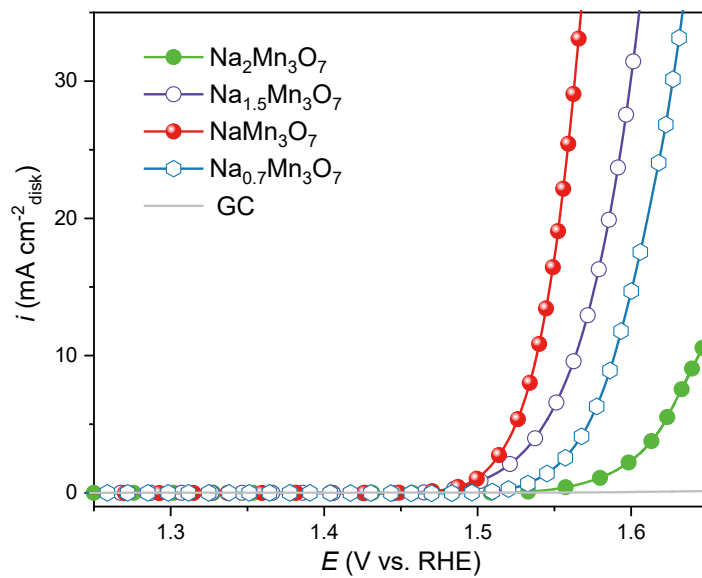

**Supplementary Fig. 16** | Polarization curves (current normalized by geometric area of the disk) of the as-synthesized  $\text{Na}_x\text{Mn}_3\text{O}_7$ . (The 2<sup>nd</sup> LSV curve is used for comparison.)

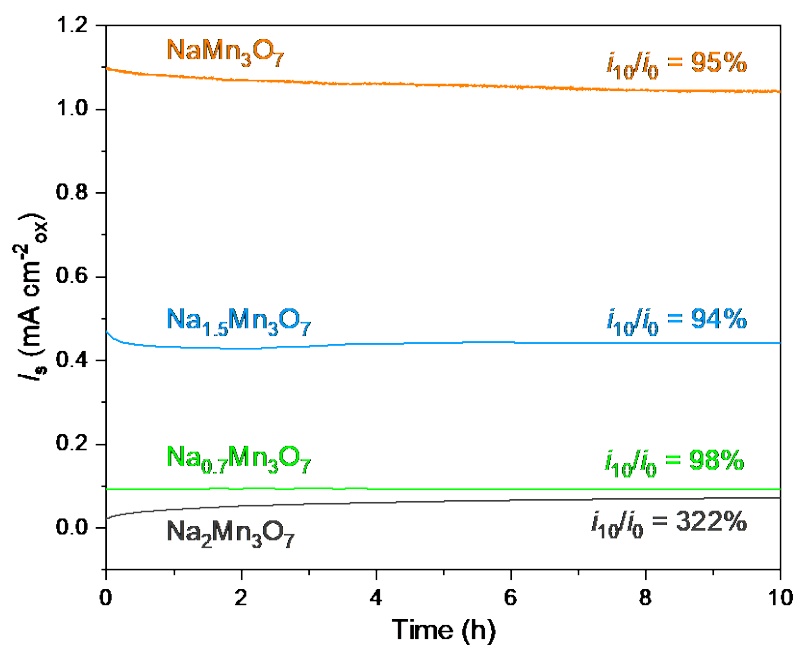

**Supplementary Fig. 17** | Chronoamperometric curve of  $\text{Na}_x\text{Mn}_3\text{O}_7$  at 1.55 V versus RHE.

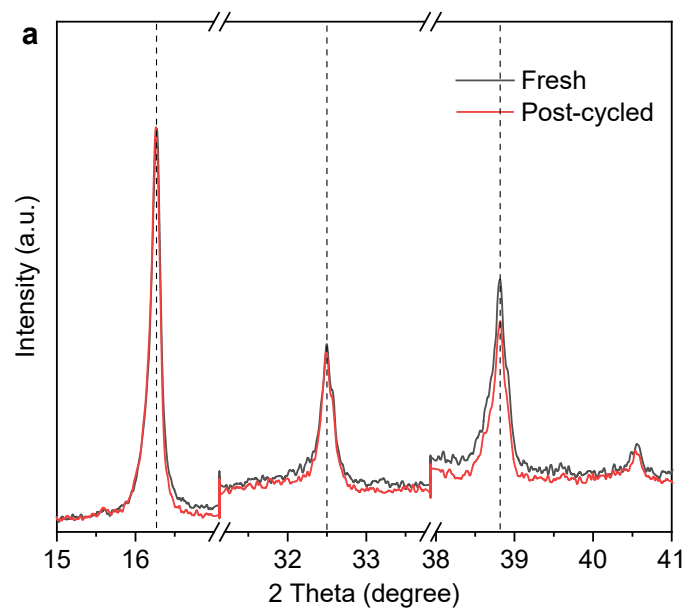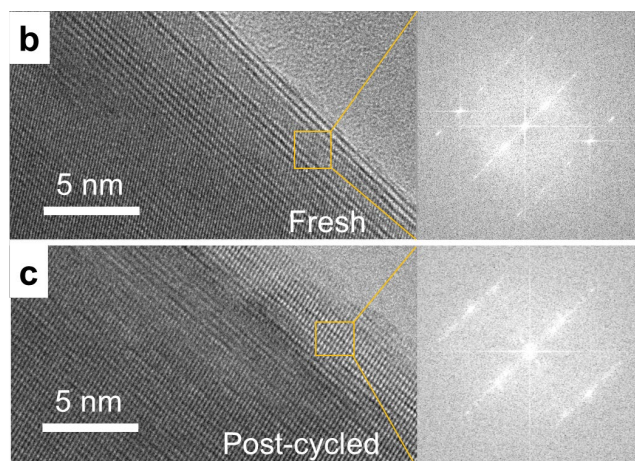

**Supplementary Fig. 18** | **a**, XRD patterns of NaMn<sub>3</sub>O<sub>7</sub> before and after OER measurement. **b, c**, HRTEM images and corresponding FFT patterns of NaMn<sub>3</sub>O<sub>7</sub> before and after OER measurement.

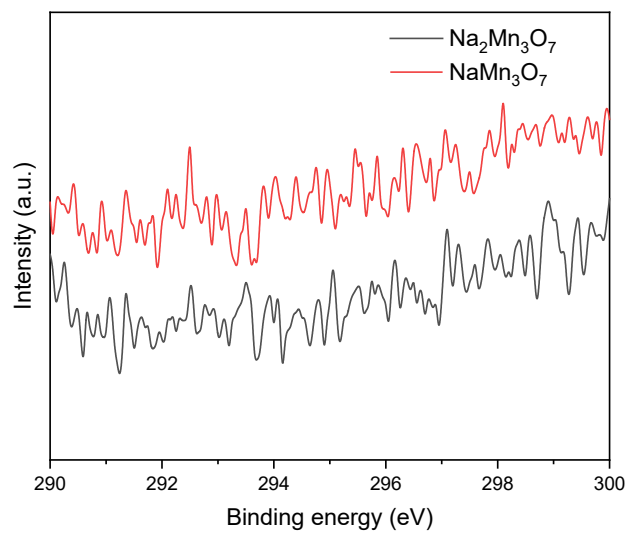

**Supplementary Fig. 19** | XPS spectra of K 2p of  $\text{Na}_2\text{Mn}_3\text{O}_7$  and  $\text{NaMn}_3\text{O}_7$  after OER measurement.



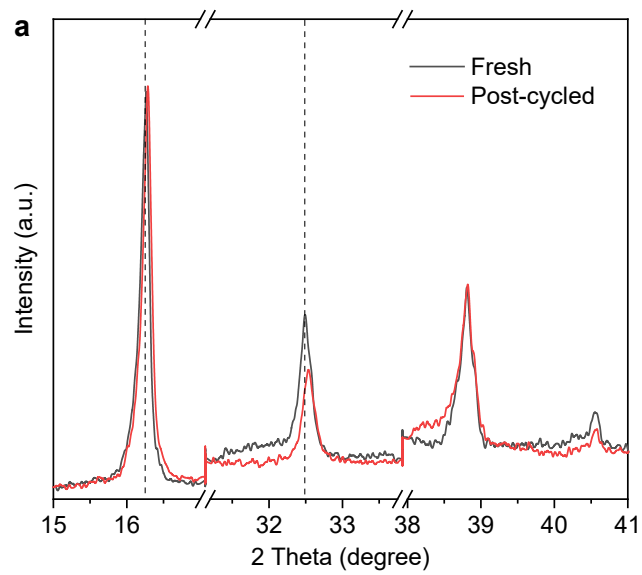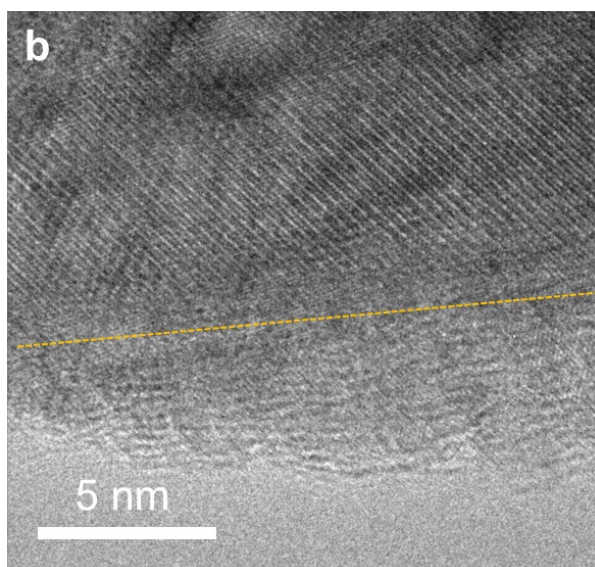

**Supplementary Fig. 20** | **a**, XRD patterns of Na<sub>2</sub>Mn<sub>3</sub>O<sub>7</sub> before and after OER measurement. **b**, HRTEM of Na<sub>2</sub>Mn<sub>3</sub>O<sub>7</sub> after OER measurement.

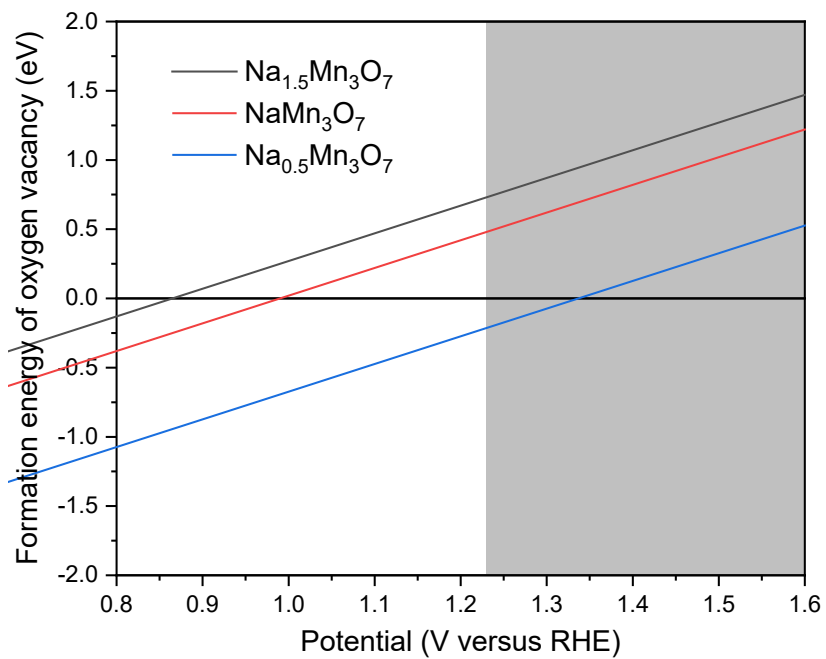

**Supplementary Fig. 21** | Formation energy of oxygen vacancy in  $\text{Na}_x\text{Mn}_3\text{O}_7$  ( $x = 1.5, 1$  and  $0.5$ ).

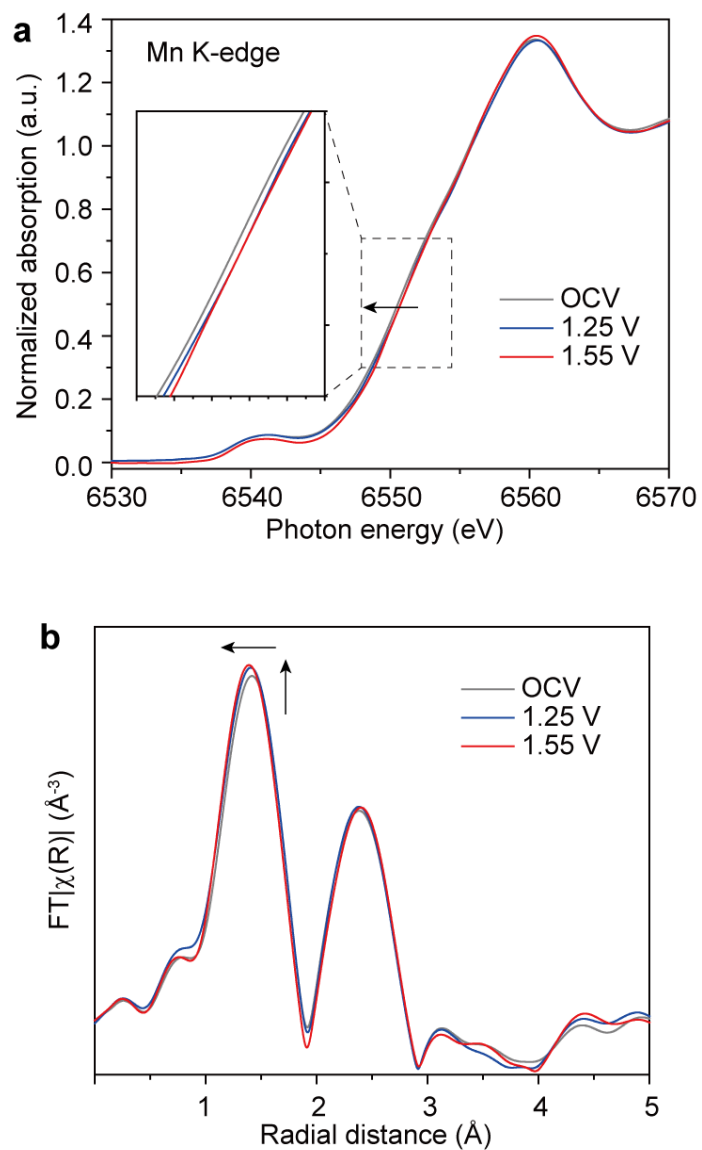

**Supplementary Fig. 22** | Normalized *in situ* Mn K-edge XANES spectra (**a**) and Fourier transformed EXAFS  $k^3\chi(k)$  oscillation functions (**b**) of  $\text{NaMn}_3\text{O}_7$  under open circuit, 1.25 and 1.55 V (versus RHE).

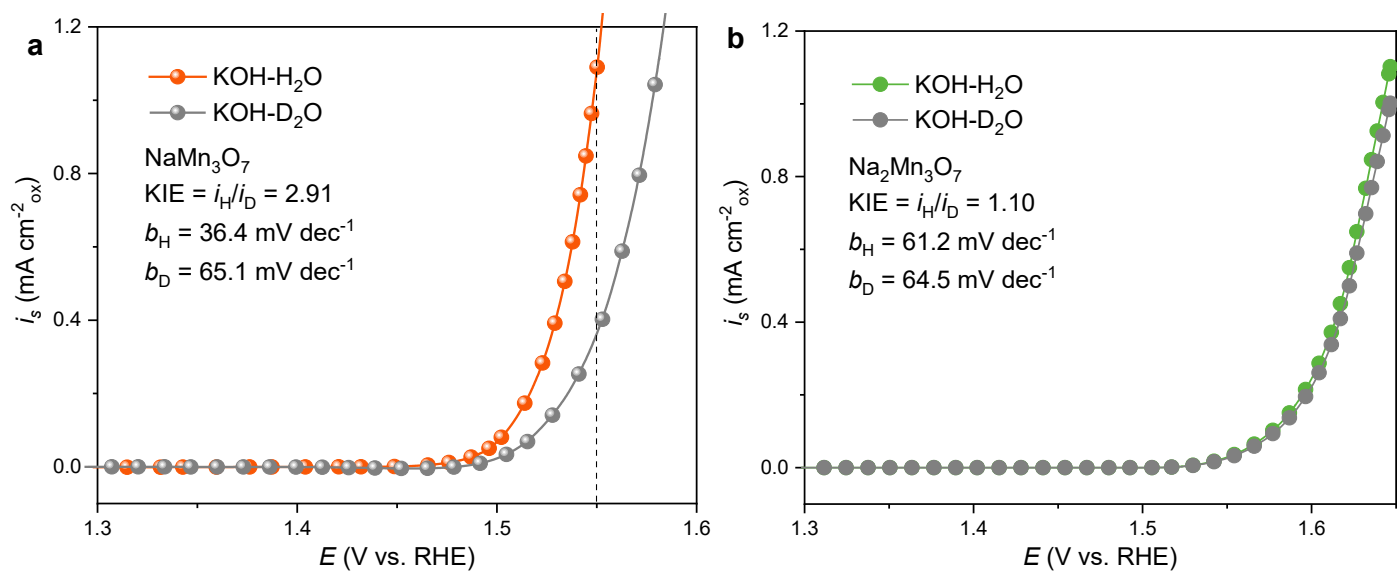

**Supplementary Fig. 23** | Comparison of H/D kinetic isotope effect (KIE) on  $\text{NaMn}_3\text{O}_7$  (**a**) and  $\text{Na}_2\text{Mn}_3\text{O}_7$  (**b**) measured in  $\text{H}_2\text{O}$  and  $\text{D}_2\text{O}$ , respectively (the 2<sup>nd</sup> LSV curve is used for comparison.).

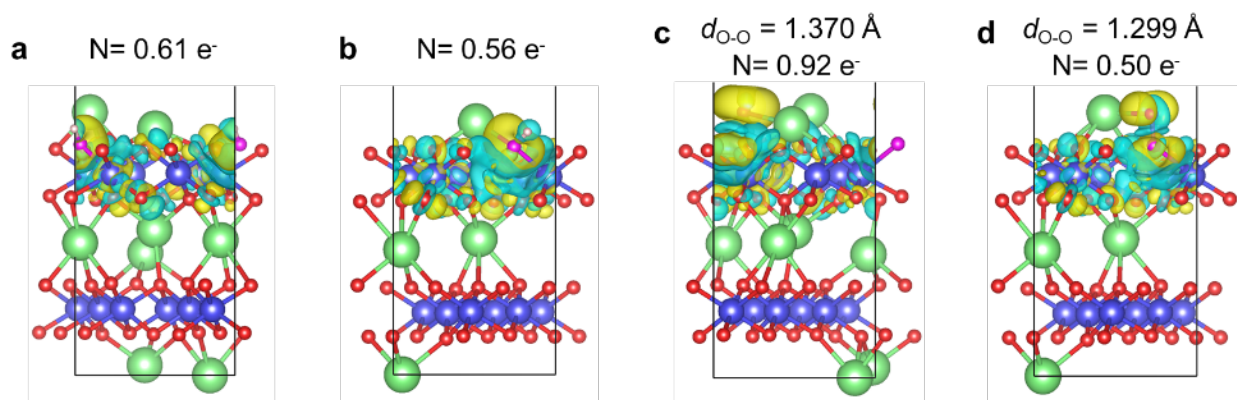

**Supplementary Fig. 24** | Comparison of charge density difference of different adsorbed intermediates of \*OH and \*OO on  $\text{Na}_2\text{Mn}_3\text{O}_7$  and  $\text{NaMn}_3\text{O}_7$ . Yellow and blue colours represent charge accumulation and depletion, respectively, with an iso-surface value of  $0.0015 e\text{\AA}^{-3}$ . N represents the number of transferred electrons between the adsorbed intermediate and catalyst surface.

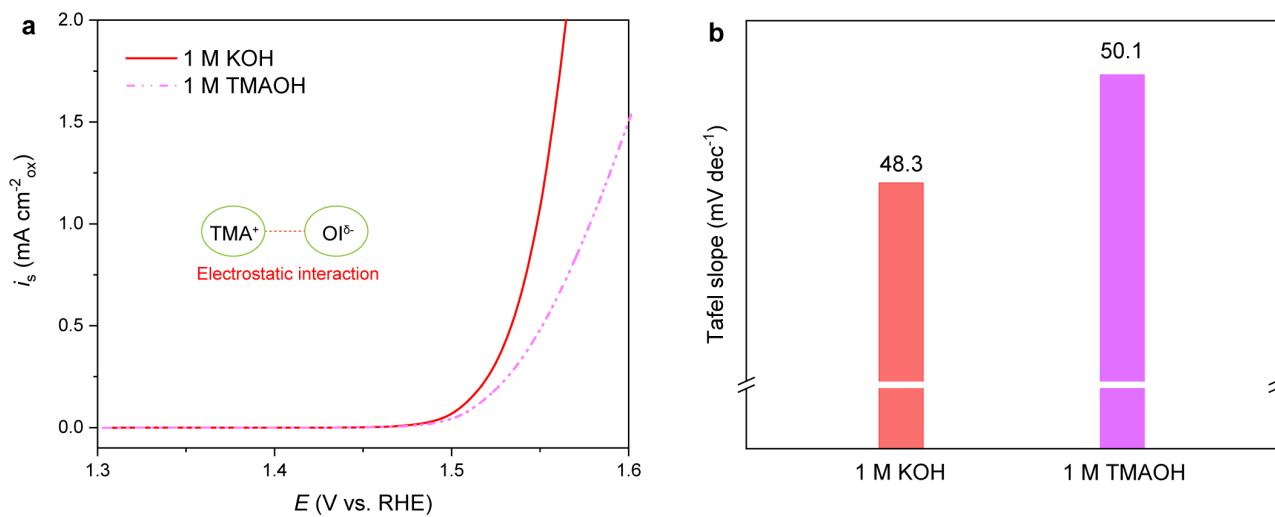

**Supplementary Fig. 25** | Comparison of polarization curves (**a**) and derived Tafel slopes (**b**) of NaMn<sub>3</sub>O<sub>7</sub> in 1 M KOH and 1 M TMAOH (OI<sup>δ-</sup> represents as the negative oxygenated intermediates.).

## Supplementary References

- 1 Zhao, Z.-J. *et al.* Theory-guided design of catalytic materials using scaling relationships and reactivity descriptors. *Nat. Rev. Mater.* **4**, 792-804 (2019).
- 2 Man, I. C. *et al.* Universality in oxygen evolution electrocatalysis on oxide surfaces. *ChemCatChem* **3**, 1159-1165 (2011).
- 3 Rong, X., Parolin, J. & Kolpak, A. M. A fundamental relationship between reaction mechanism and stability in metal oxide catalysts for oxygen evolution. *ACS Catal.* **6**, 1153-1158 (2016).
- 4 Nørskov, J. K. *et al.* Origin of the overpotential for oxygen reduction at a fuel-cell cathode. *J. Phys. Chem. B* **108**, 17886-17892 (2004).
- 5 Doyle, A. D., Montoya, J. H. & Vojvodic, A. Improving oxygen electrochemistry through nanoscopic confinement. *ChemCatChem* **7**, 738-742 (2015).
- 6 Wei, C. *et al.* Recommended practices and benchmark activity for hydrogen and oxygen electrocatalysis in water splitting and fuel cells. *Adv. Mater.*, e1806296 (2019).
